# Supplementary material for: Comparative genomic analyses of nickel, cobalt and vitamin B12 utilization
Source: PubMed Central journal article supplement (PMC2667541; doi:10.1186/1471-2164-10-78), 2009-02-10
Supplement: 1471-2164-10-78-S11.pdf [file 1471-2164-10-78-S11.pdf]

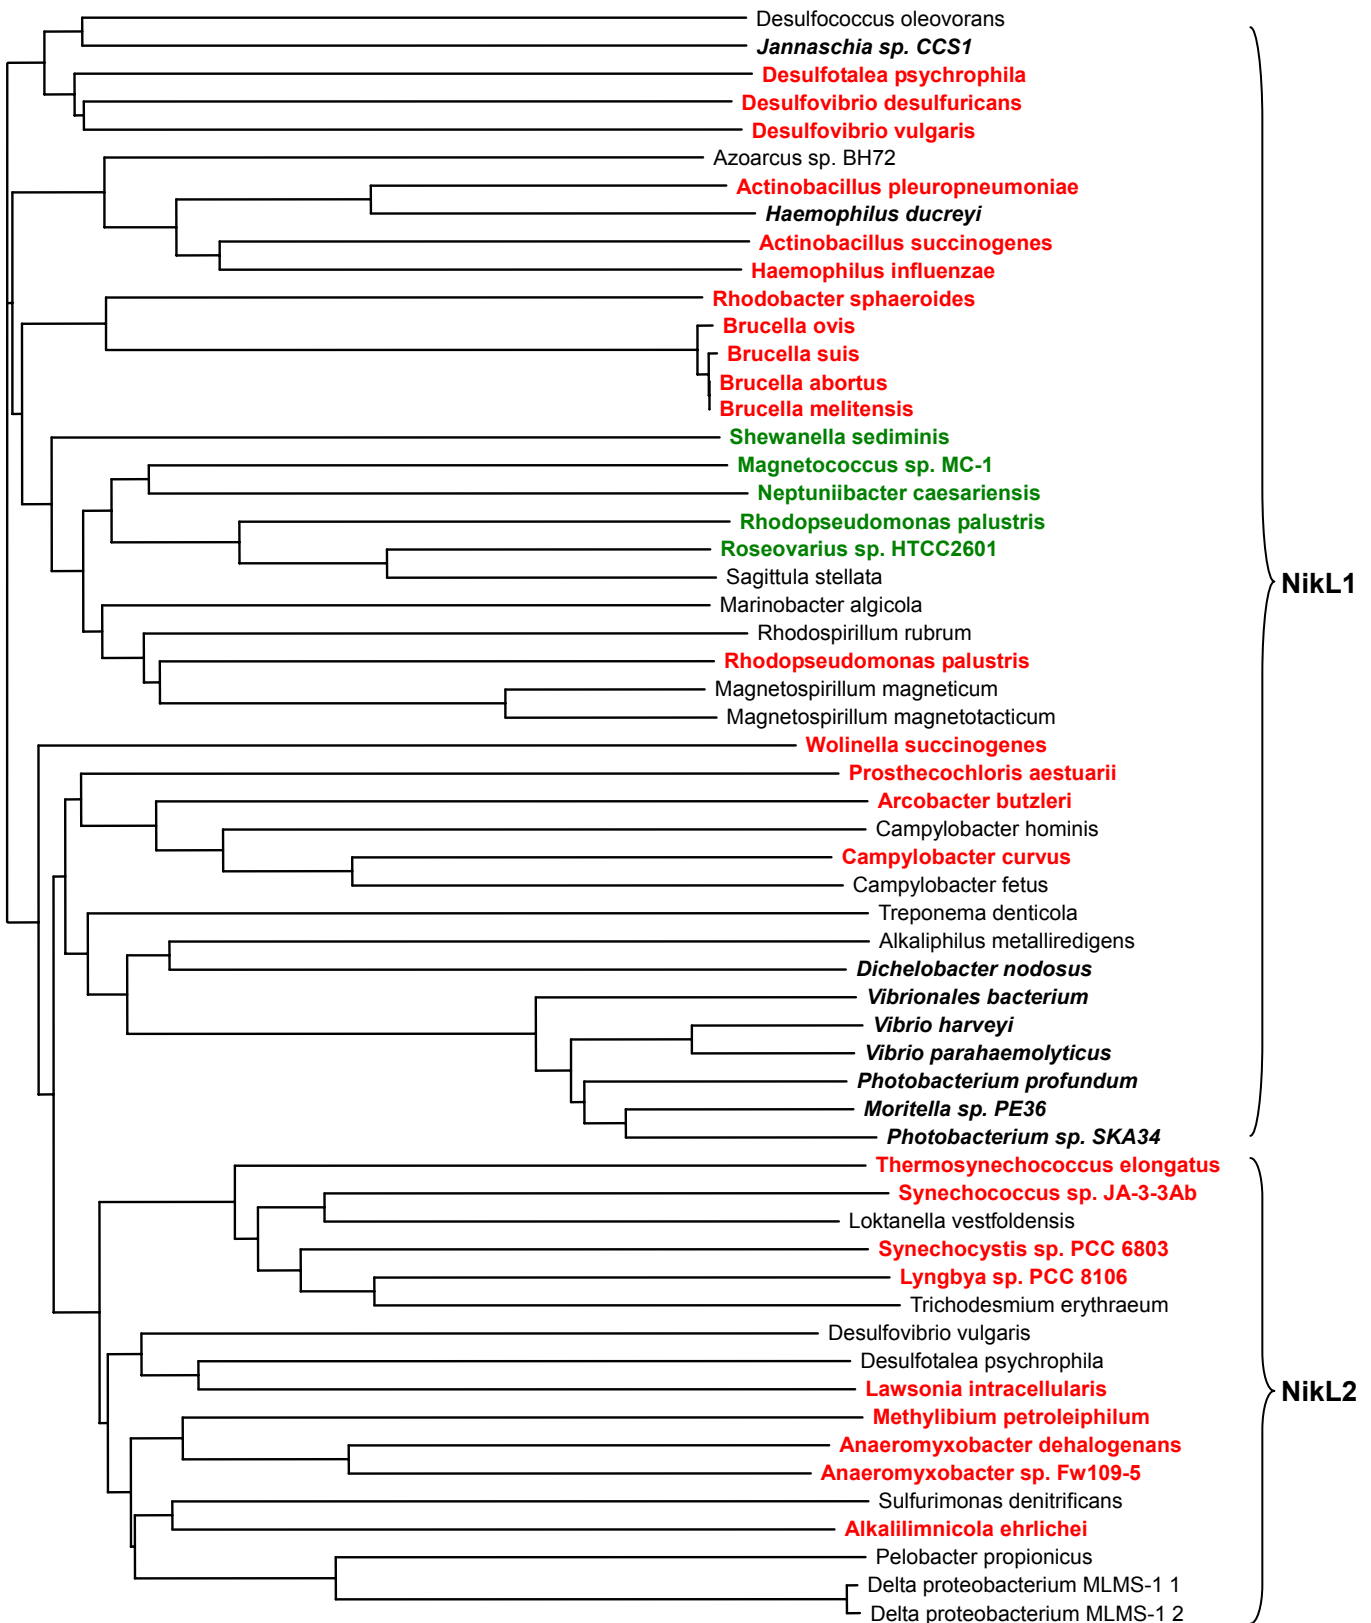

0.1
