# Supplementary figures and images for: Comparative genomic analyses of nickel, cobalt and vitamin B12 utilization
Source: Springer Nature journal article supplement (doi:10.1186/1471-2164-10-78), 2009-02-10

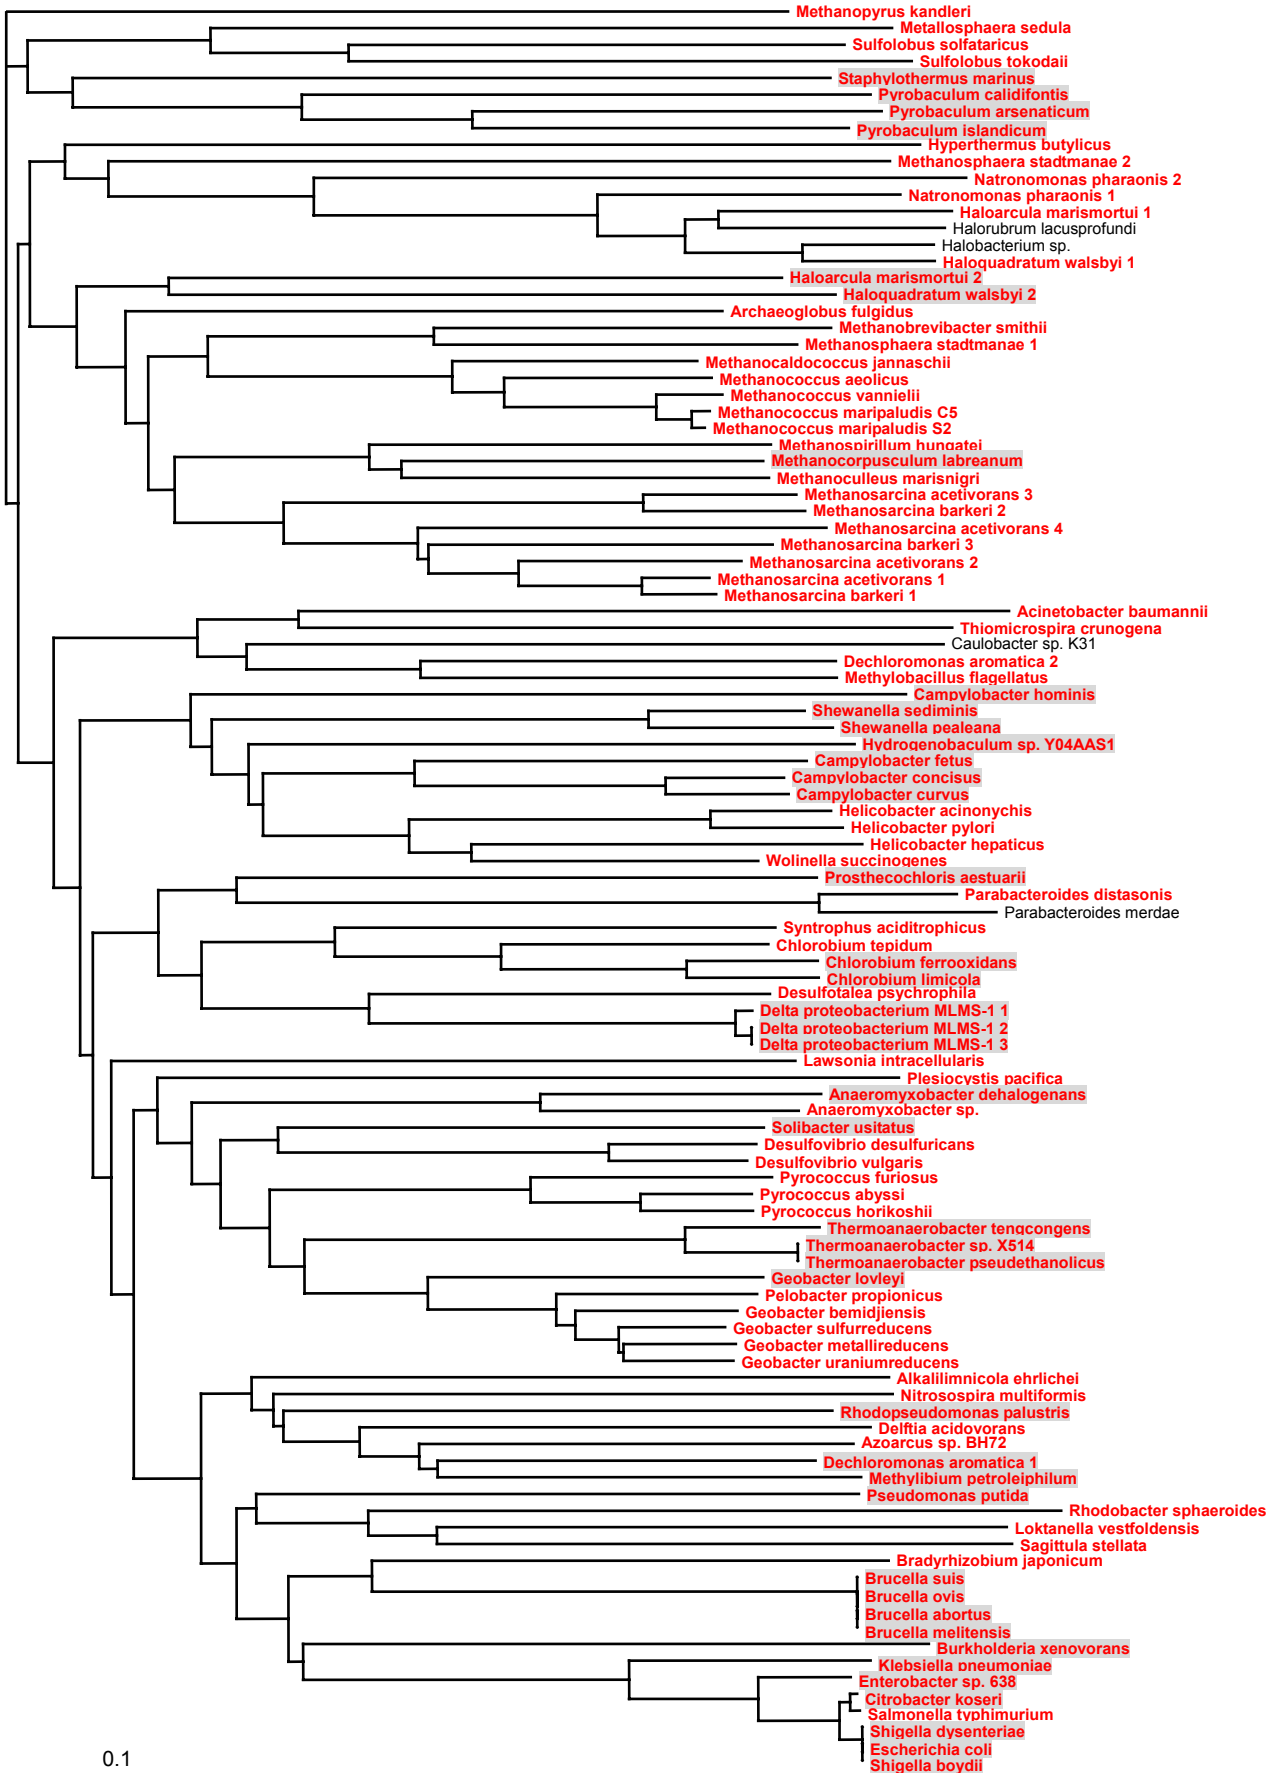

0.1

Supplement: Additional file 19 [file 1471-2164-10-78-s19.pdf]
